# Supplementary material
Source: Springer Nature journal article supplement (https://www.springermedizin.de/resource/supplementary/12885_2013_4291_MOESM3_ESM.pdf/9467606)

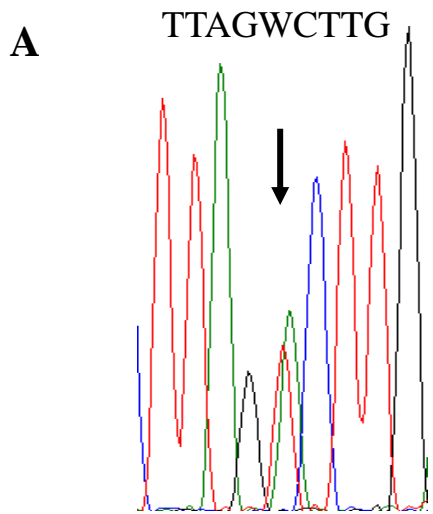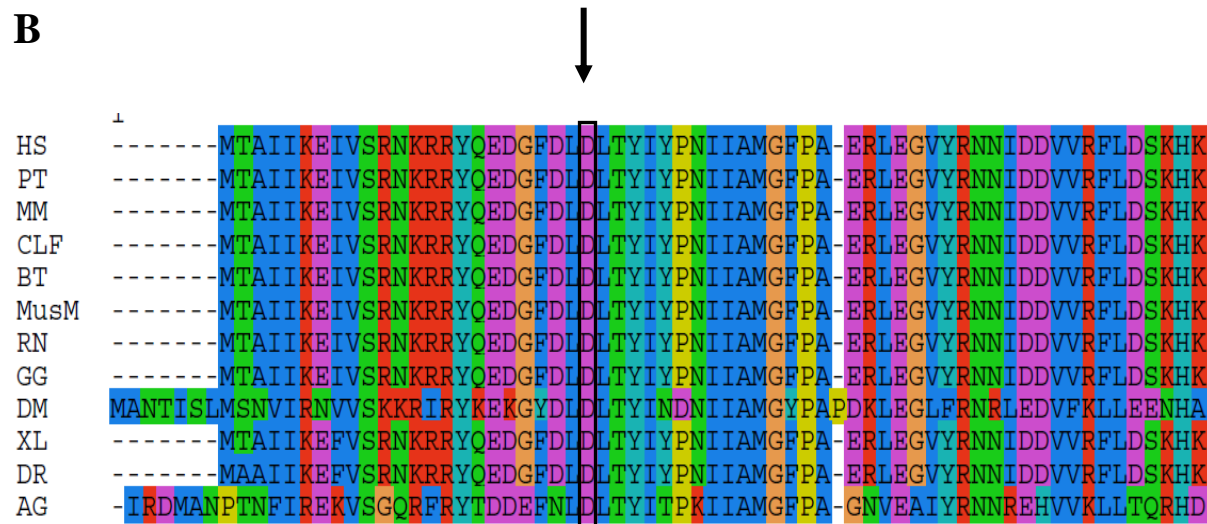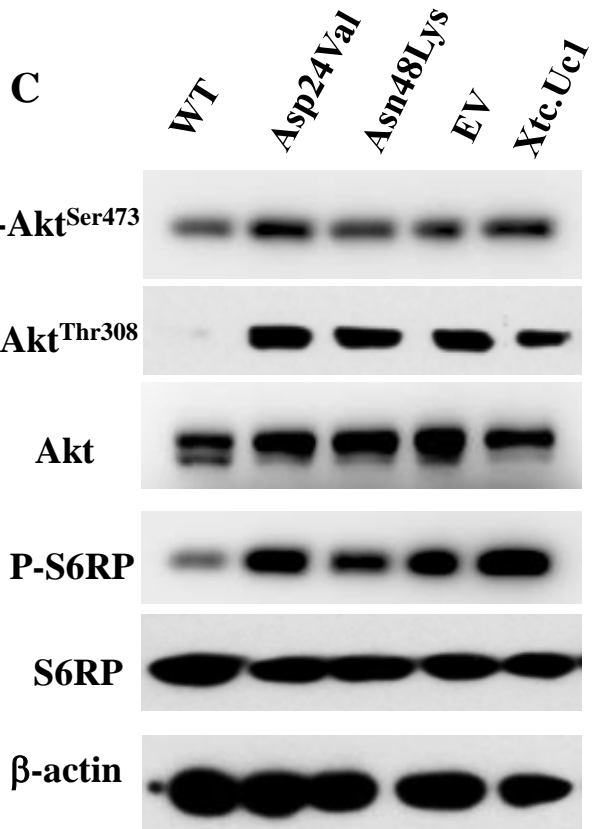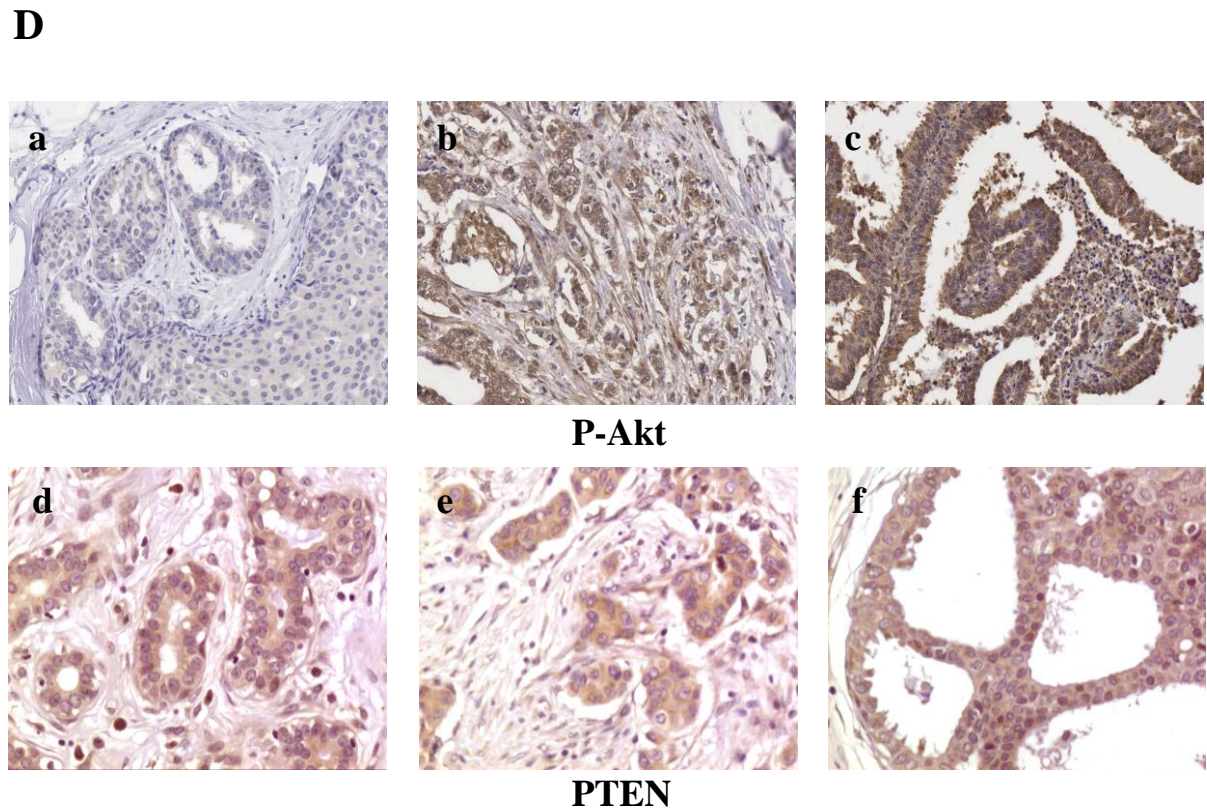

Supplement: MOESM3 [file 9467606]
